# Supplementary material for: The Association Between Oxidative Balance Score and Liver Fibrosis: Evidence from NHANES 2007-2020
Source: Research Square preprint supplement (doi:10.21203/rs.3.rs-7053792/v1), 2025-07-10
Supplement: Supplementary file 1 [file 42ffcf2fb76f7f7705291e19.docx]

**Supplementary table 1.** Description of the components of OBS.

| **OBS components** | **Antioxidant or pro-oxidant** |
| --- | --- |
| **Dietary OBS** | |
| Dietary fiber | Antioxidant |
| Carotene | Antioxidant |
| Vitamin B2 | Antioxidant |
| Niacin | Antioxidant |
| Vitamin B6 | Antioxidant |
| Total folate | Antioxidant |
| Vitamin B12 | Antioxidant |
| Vitamin C | Antioxidant |
| Vitamin E | Antioxidant |
| Calcium | Antioxidant |
| Magnesium | Antioxidant |
| Zinc | Antioxidant |
| Copper | Antioxidant |
| Selenium | Antioxidant |
| Total fat | Pro-oxidant |
| Iron | Pro-oxidant |
| **Lifestyle OBS** |  |
| Physical activity | Antioxidant |
| Alcohol | Pro-oxidant |
| Body mass index | Pro-oxidant |
| Cotinine | Pro-oxidant |

Abbreviations: OBS, oxidative balance score.

**Supplementary table 2.** Baseline characteristics classified according to Liver fibrosis status.

| **Characteristic** | **N**1 | **Overall**  N = 46,057,2372 | **No liver fibrosis**  N = 39,461,5402 | **liver fibrosis**  N = 6,595,6962 | **p-value**3 |
| --- | --- | --- | --- | --- | --- |
| **Gender** | 6,258 |  |  |  | **<0.001** |
| *Female* |  | 2,756 (45%) | 2,499 (49%) | 257 (23%) |  |
| *Male* |  | 3,502 (55%) | 2,689 (51%) | 813 (77%) |  |
| **Age** | 6,258 | 44 (15) | 42 (15) | 54 (14) | **<0.001** |
| **Race** | 6,258 |  |  |  | 0.2 |
| *Mexican American* |  | 891 (8.0%) | 709 (7.7%) | 182 (9.5%) |  |
| *Non-Hispanic Black* |  | 1,277 (9.4%) | 1,034 (9.2%) | 243 (10%) |  |
| *Non-Hispanic White* |  | 2,771 (71%) | 2,334 (71%) | 437 (69%) |  |
| *Other Hispanic* |  | 595 (5.2%) | 487 (5.2%) | 108 (5.0%) |  |
| *Other Race - Including Multi-Racial* |  | 724 (6.9%) | 624 (7.0%) | 100 (5.9%) |  |
| PIR | 6,258 | 3.26 (1.62) | 3.25 (1.61) | 3.29 (1.66) | 0.4 |
| **Marriage** | 6,258 |  |  |  | **0.027** |
| *No single* |  | 3,788 (65%) | 3,112 (64%) | 676 (69%) |  |
| *single* |  | 2,470 (35%) | 2,076 (36%) | 394 (31%) |  |
| **Education** | 6,258 |  |  |  | **<0.001** |
| *9-11th grade (Includes 12th grade with no diploma)* |  | 706 (8.1%) | 570 (7.9%) | 136 (9.4%) |  |
| *College graduate or above* |  | 1,863 (37%) | 1,602 (38%) | 261 (30%) |  |
| *High school graduate/GED or equivalent* |  | 1,346 (21%) | 1,073 (19%) | 273 (27%) |  |
| *Less than 9th grade* |  | 334 (2.5%) | 242 (2.3%) | 92 (4.1%) |  |
| *Some college or AA degree* |  | 2,009 (32%) | 1,701 (32%) | 308 (30%) |  |
| **Hypertension** | 6,258 | 1,828 (27%) | 1,271 (23%) | 557 (50%) | **<0.001** |
| **eGFR** | 6,258 | 98 (19) | 99 (19) | 91 (21) | **<0.001** |
| **OBS** | 6,258 | 20 (7) | 20 (7) | 20 (7) | 0.068 |
| 1N not Missing (unweighted) | | | | | |
| 2median (IQR) for continuous; n (%) for categorical | | | | | |
| 3Pearson's X^2: Rao & Scott adjustment; Design-based KruskalWallis test | | | | | |

Abbreviations: OBS, oxidative balance score; PIR, family income to poverty ratio.

**Supplementary table 3**. Threshold effect analysis of the nonlinear relationship between OBS and Liver fibrosis.

|  | **Model 1** | | | **Model 2** | | | **Model 3** | | |
| --- | --- | --- | --- | --- | --- | --- | --- | --- | --- |
| **Characteristic** | **OR**1 | **95% CI**1 | **p-value** | **OR**1 | **95% CI**1 | **p-value** | **OR**1 | **95% CI**1 | **p-value** |
| OBS≤20 (Male) | 0.97 | 0.93, 1.01 | 0.086 | 0.95 | 0.91, 0.98 | 0.004 | 0.95 | 0.91, 0.98 | 0.005 |
| OBS＞20 (Male) | 0.97 | 0.93, 1.01 | 0.11 | 0.97 | 0.93, 1.01 | 0.2 | 0.98 | 0.94, 1.02 | 0.3 |
| OBS≤19 (Female) | 0.96 | 0.91, 1.02 | 0.2 | 0.95 | 0.89, 1.02 | 0.13 | 0.96 | 0.89, 1.02 | 0.2 |
| OBS＞19 (Female) | 0.96 | 0.90, 1.02 | 0.2 | 0.97 | 0.91, 1.04 | 0.4 | 0.98 | 0.92, 1.04 | 0.5 |
| 1OR = Odds Ratio, CI = Confidence Interval | | | | | | | | | |

Abbreviations: OBS, oxidative balance score. Model 1 was an unadjusted model, Model 2 adjusted for age, race and marital status, and Model 3 was adjusted for hypertension and estimated glomerular filtration rate (eGFR) based on Model 2.

**Supplementary table 4**. Multivariate regression analysis with OBS division according to tertiles or quintiles.

|  | **Model 1** | | | | | | **Model 2** | | | | | | **Model 3** | | | | | |
| --- | --- | --- | --- | --- | --- | --- | --- | --- | --- | --- | --- | --- | --- | --- | --- | --- | --- | --- |
| **Characteristic** | **OR**1 | **95% CI**1 | **p-value** | **OR**1 | **95% CI**1 | P-trend | **OR**1 | **95% CI**1 | **p-value** | **OR**1 | **95% CI**1 | P-trend | **OR**1 | **95% CI**1 | **p-value** | **OR**1 | **95% CI**1 | P-trend |
| OBS (Male) |  |  |  |  |  |  |  |  |  |  |  |  |  |  |  |  |  |  |
| T1 | — | — |  |  |  |  | — | — |  |  |  |  | — | — |  |  |  |  |
| T2 | 0.90 | 0.69, 1.17 | 0.4 |  |  |  | 0.83 | 0.61, 1.12 | 0.2 |  |  |  | 0.80 | 0.59, 1.09 | 0.2 |  |  |  |
| T3 | 0.81 | 0.59, 1.10 | 0.2 |  |  |  | 0.79 | 0.56, 1.12 | 0.2 |  |  |  | 0.79 | 0.56, 1.11 | 0.2 |  |  |  |
| trend |  |  |  | 0.90 | 0.77, 1.05 | 0.2 |  |  |  | 0.89 | 0.75, 1.06 | 0.2 |  |  |  | 0.89 | 0.74, 1.06 | 0.2 |
| Q1 | — | — |  |  |  |  | — | — |  |  |  |  | — | — |  |  |  |  |
| Q2 | 0.98 | 0.71, 1.34 | 0.9 |  |  |  | 0.86 | 0.62, 1.19 | 0.3 |  |  |  | 0.82 | 0.58, 1.14 | 0.2 |  |  |  |
| Q3 | 0.80 | 0.58, 1.10 | 0.2 |  |  |  | 0.72 | 0.51, 1.02 | 0.065 |  |  |  | 0.71 | 0.50, 1.01 | 0.056 |  |  |  |
| Q4 | 0.89 | 0.64, 1.25 | 0.5 |  |  |  | 0.85 | 0.58, 1.26 | 0.4 |  |  |  | 0.82 | 0.54, 1.23 | 0.3 |  |  |  |
| Q5 | 0.79 | 0.55, 1.14 | 0.2 |  |  |  | 0.74 | 0.50, 1.10 | 0.13 |  |  |  | 0.73 | 0.49, 1.10 | 0.13 |  |  |  |
| trend |  |  |  | 0.95 | 0.87, 1.03 | 0.2 |  |  |  | 0.94 | 0.86, 1.04 | 0.2 |  |  |  | 0.94 | 0.85, 1.03 | 0.2 |
| OBS (Female) |  |  |  |  |  |  |  |  |  |  |  |  |  |  |  |  |  |  |
| T1 |  |  |  |  |  |  |  |  |  |  |  |  |  |  |  |  |  |  |
| T2 | 0.70 | 0.45, 1.07 | 0.10 |  |  |  | 0.67 | 0.42, 1.06 | 0.088 |  |  |  | 0.69 | 0.43, 1.10 | 0.12 |  |  |  |
| T3 | 0.55 | 0.35, 0.87 | 0.010 |  |  |  | 0.54 | 0.33, 0.87 | 0.012 |  |  |  | 0.55 | 0.33, 0.90 | 0.019 |  |  |  |
| trend |  |  |  | 0.74 | 0.58, 0.93 | 0.011 |  |  |  | 0.73 | 0.57, 0.93 | 0.013 |  |  |  | 0.74 | 0.57, 0.95 | 0.020 |
| Q1 | — | — |  |  |  |  | — | — |  |  |  |  | — | — |  |  |  |  |
| Q2 | 0.89 | 0.58, 1.39 | 0.6 |  |  |  | 0.84 | 0.52, 1.36 | 0.5 |  |  |  | 0.90 | 0.55, 1.45 | 0.7 |  |  |  |
| Q3 | 0.75 | 0.45, 1.26 | 0.3 |  |  |  | 0.67 | 0.38, 1.18 | 0.2 |  |  |  | 0.70 | 0.39, 1.26 | 0.2 |  |  |  |
| Q4 | 0.68 | 0.35, 1.33 | 0.3 |  |  |  | 0.63 | 0.31, 1.29 | 0.2 |  |  |  | 0.67 | 0.33, 1.39 | 0.3 |  |  |  |
| Q5 | 0.49 | 0.29, 0.83 | 0.008 |  |  |  | 0.47 | 0.26, 0.83 | 0.009 |  |  |  | 0.50 | 0.28, 0.90 | 0.021 |  |  |  |
| trend |  |  |  | 0.85 | 0.75, 0.96 | 0.011 |  |  |  | 0.84 | 0.72, 0.96 | 0.014 |  |  |  | 0.85 | 0.73, 0.98 | 0.025 |

Abbreviations: OBS, oxidative balance score. Model 1 was an unadjusted model, Model 2 adjusted for age, race and marital status, and Model 3 was adjusted for hypertension and estimated glomerular filtration rate (eGFR) based on Model 2.
