# Supplementary material for: The Association Between Oxidative Balance Score and Liver Fibrosis: Evidence from NHANES 2007-2020
Source: Research Square preprint supplement (doi:10.21203/rs.3.rs-7053792/v1), 2025-07-10
Supplement: Supplementary file 3 [file de6d72ae55d6f89381fc2eee.pdf]

| Variable                                           | OR(95% CI)         |                    | P value | P for interaction |
|----------------------------------------------------|--------------------|--------------------|---------|-------------------|
| <b>Age</b>                                         |                    |                    |         | <b>0.018</b>      |
| >40<=60                                            | 1.01(0.98 to 1.03) |                    | 0.517   |                   |
| >60                                                | 0.97(0.94 to 1.01) |                    | 0.116   |                   |
| <=40                                               | 0.97(0.94 to 0.99) |                    | 0.006   |                   |
| <b>Race</b>                                        |                    |                    |         | <b>0.672</b>      |
| Mexican American                                   | 0.96(0.93 to 0.99) |                    | 0.025   |                   |
| Non-Hispanic Black                                 | 1.01(0.98 to 1.04) |                    | 0.531   |                   |
| Non-Hispanic White                                 | 1.00(0.97 to 1.02) |                    | 0.715   |                   |
| Other Hispanic                                     | 0.95(0.91 to 1.00) |                    | 0.058   |                   |
| Other Race - Including Multi-Racial                | 0.95(0.91 to 0.99) |                    | 0.031   |                   |
| <b>Marriage</b>                                    |                    |                    |         | <b>0.225</b>      |
| No single                                          | 0.98(0.96 to 1.00) |                    | 0.067   |                   |
| single                                             | 1.00(0.98 to 1.03) |                    | 0.907   |                   |
| <b>Education</b>                                   |                    |                    |         | <b>0.477</b>      |
| 9-11th grade (Includes 12th grade with no diploma) | 0.97(0.93 to 1.01) |                    | 0.129   |                   |
| College graduate or above                          | 0.98(0.94 to 1.01) |                    | 0.188   |                   |
| High school graduate/GED or equivalent             | 1.04(1.00 to 1.07) |                    | 0.054   |                   |
| Less than 9th grade                                | 0.95(0.90 to 1.00) |                    | 0.067   |                   |
| Some college or AA degree                          | 0.99(0.96 to 1.02) |                    | 0.443   |                   |
| <b>Hypertension</b>                                |                    |                    |         | <b>&lt;0.001</b>  |
| No                                                 | 0.96(0.94 to 0.98) |                    | <0.001  |                   |
| Yes                                                | 1.03(1.00 to 1.06) |                    | 0.027   |                   |
|                                                    |                    | 0.9 1 1.1          |         |                   |
|                                                    |                    | ←————→             |         |                   |
|                                                    |                    | Low risk High risk |         |                   |
