# Supplementary figures and images for: The Association Between Oxidative Balance Score and Liver Fibrosis: Evidence from NHANES 2007-2020
Source: Research Square preprint supplement (doi:10.21203/rs.3.rs-7053792/v1), 2025-07-10

A

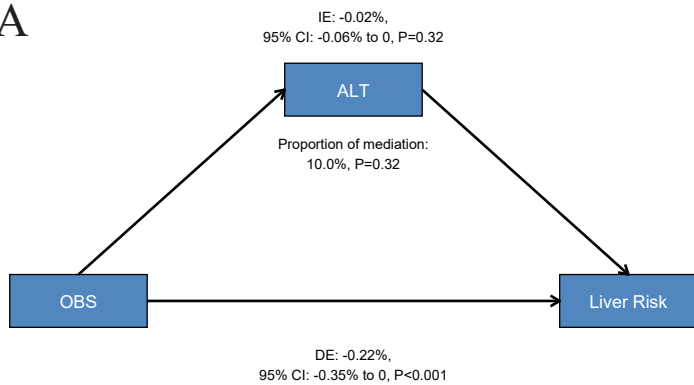

B

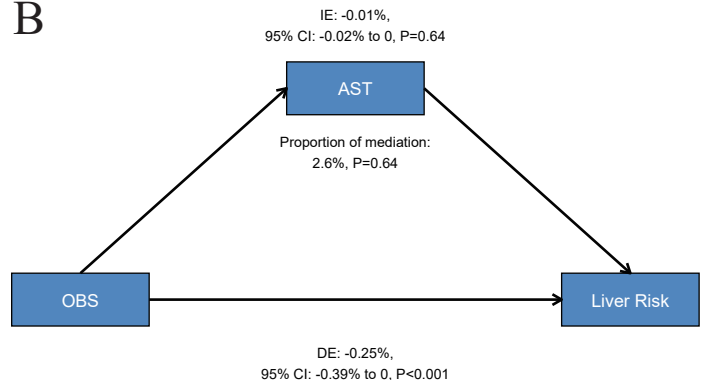

C

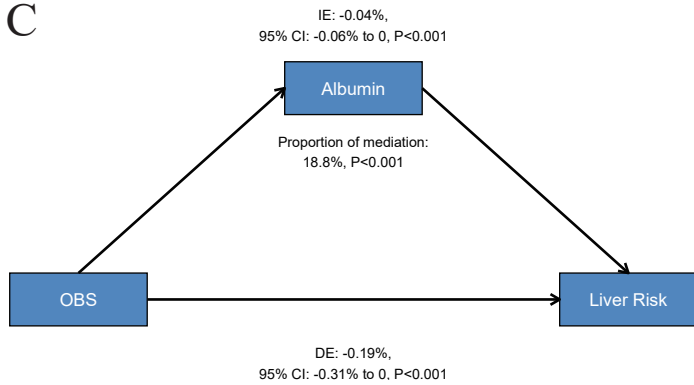

D

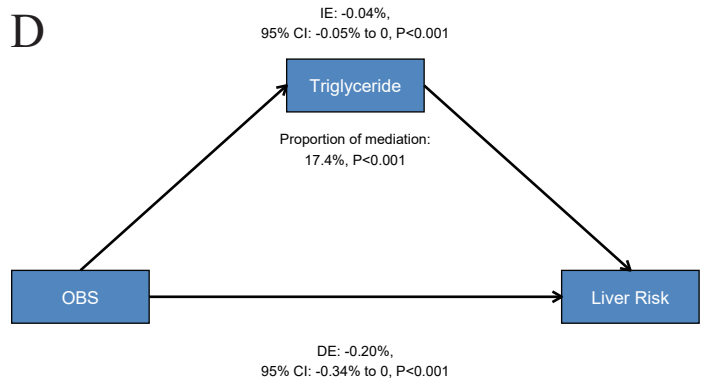

E

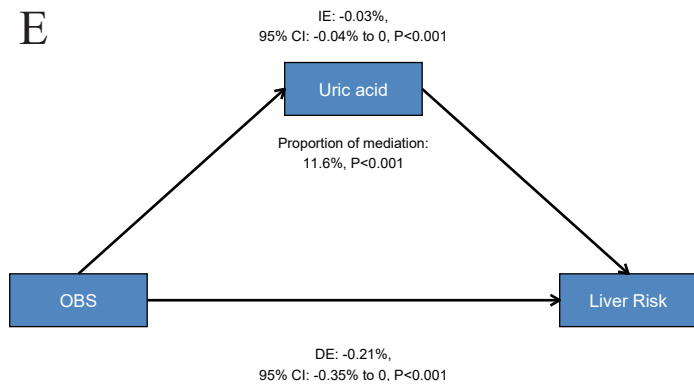

F

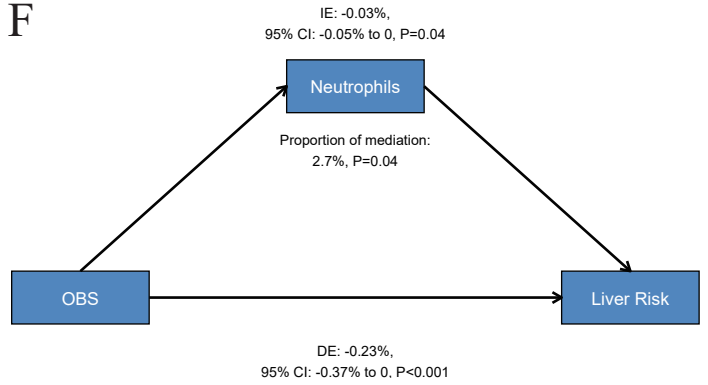

G

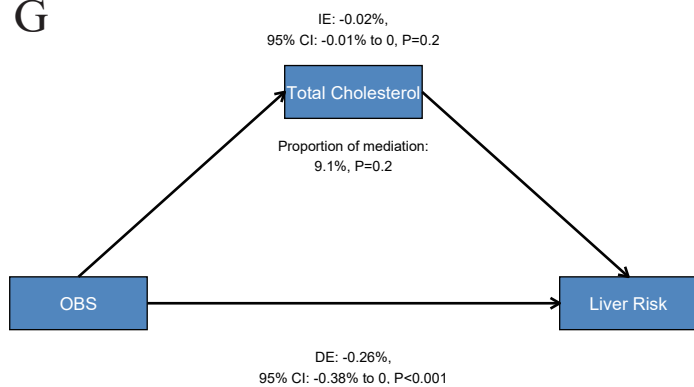

H

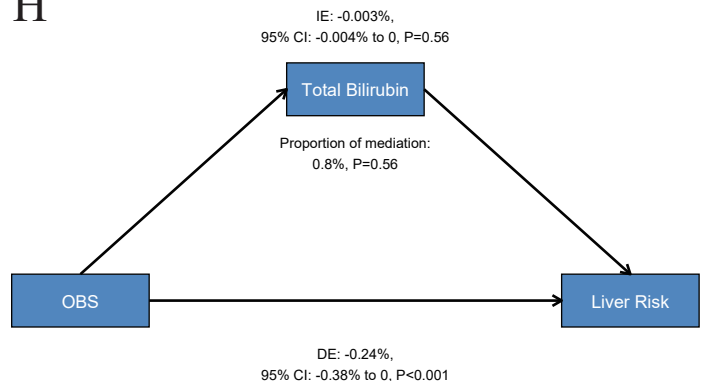

Supplement: Supplementary file 1 [file 444bb5ef03cb08b59da5fc05.pdf]

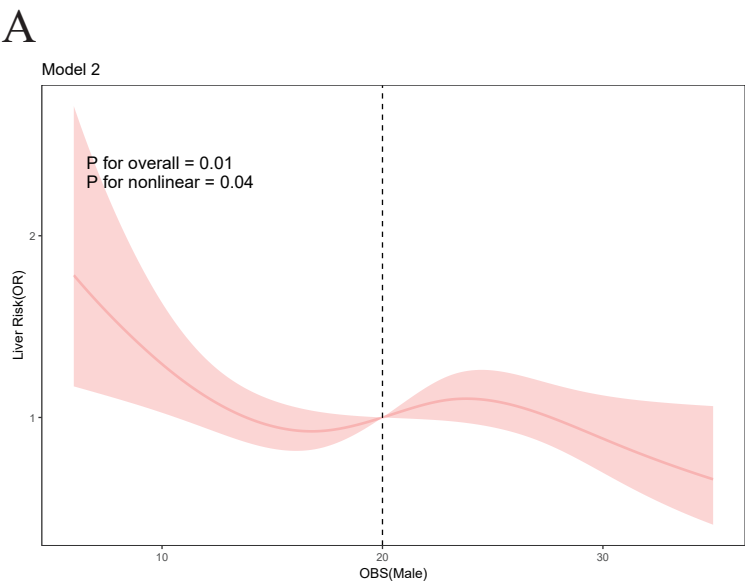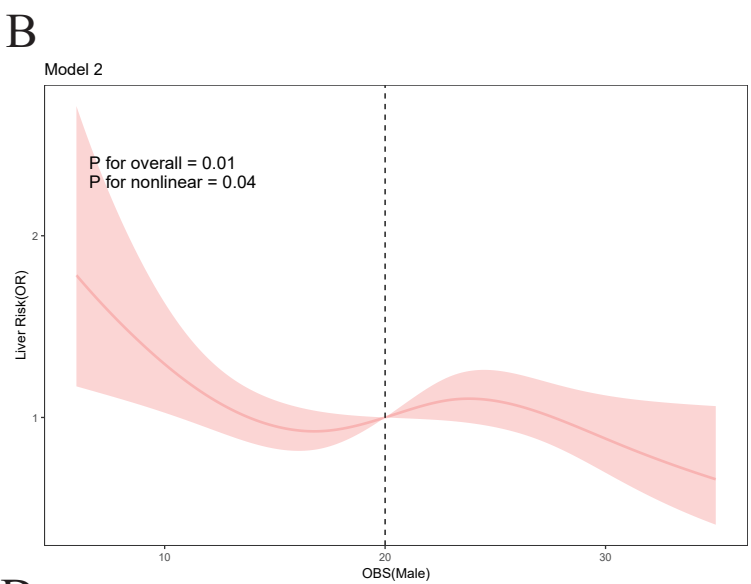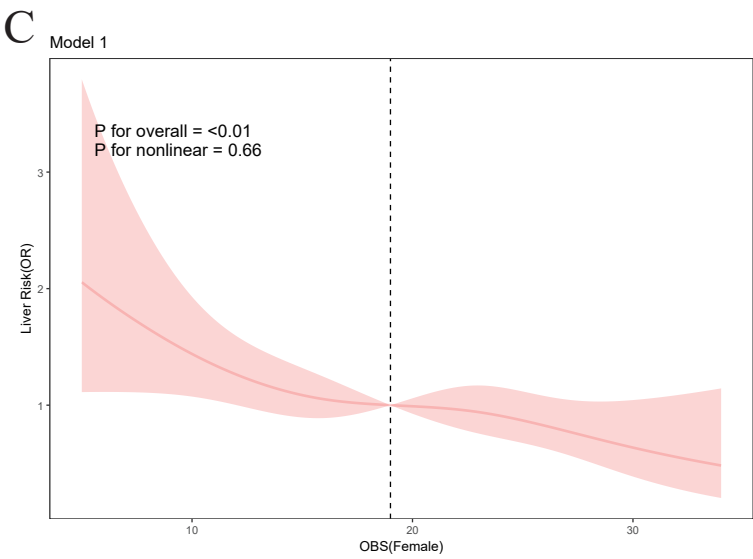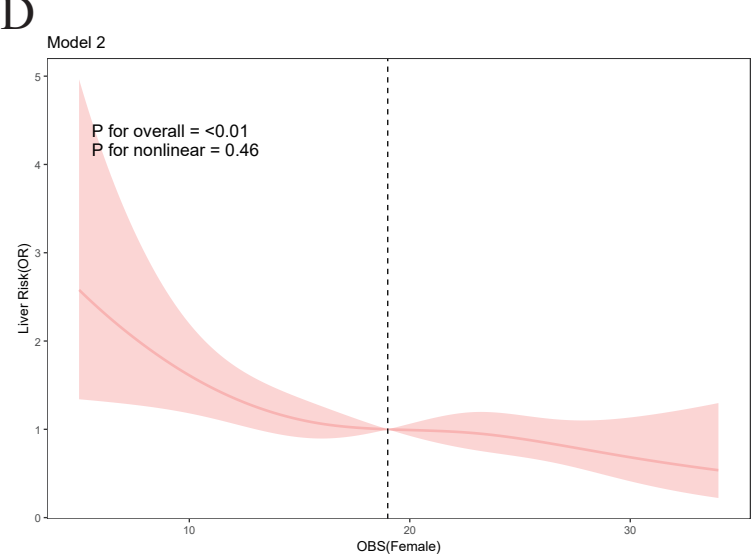

Supplement: Supplementary file 2 [file a1d9922fa9b74937681121ef.pdf]
